# Supplementary material
Source: PubMed Central journal article supplement (PMC7205489)
Supplement: AEM.00195-20-s0001.pdf [file AEM.00195-20-s0001.pdf]

1 **Supplemental Material for: Applied and Environmental Microbiology**

2 (AEM 02495)

3

4 **Diazotrophs show sign of restoration in Amazon rainforest soils with ecosystem**  
5 **rehabilitation**

6

7 **Babur S. Mirza<sup>1\*</sup>, Daniel J. McGlenn<sup>2</sup>, Brendan J.M. Bohannan<sup>3</sup>, Klaus Nüsslein<sup>4</sup>,**

8 **James M. Tiedje<sup>5</sup>, Jorge L.M. Rodrigues<sup>6,7\*</sup>**

9 <sup>1</sup> Department of Biology, Missouri State University, Springfield, Missouri, 65897, USA

10 <sup>2</sup> Department of Biology, College of Charleston, Charleston, South Carolina, 29424, USA

11 <sup>3</sup> Institute of Ecology and Evolution, Department of Biology, University of Oregon,  
12 Eugene, OR

13 <sup>4</sup> Department of Microbiology, University of Massachusetts, Amherst, MA

14 <sup>5</sup> Department of Plant, Soil, and Microbial Sciences, Michigan State University, East  
15 Lansing, MI

16 <sup>6</sup> Department of Land, Air and Water Resources, University of California, Davis, CA,  
17 95616, USA

18 <sup>7</sup> Environmental Genomics and Systems Biology Division, Lawrence Berkeley National  
19 Laboratory, Berkeley, California, 94720, USA

20

21 **Keywords:**

22

23 \*Corresponding authors: Babur S. Mirza  
24 Missouri State University  
25 Department of Biology  
26 901 S. National Ave. Springfield, MO 65897  
27 Phone: 417-836-5062  
28 Fax: 417-836-4204  
29 E-mail: baburmirza@missouristate.edu  
30

31 Jorge L. M. Rodrigues  
32 University of California - Davis  
33 Department of Land, Air and Water Resources  
34 3308 Plant and Environmental Sciences Building  
35 Davis, CA 95616  
36 Phone: 530-341-4355  
37 Fax: 530-752-1552  
38 E-mail: jmrodrigues@ucdavis.edu

39

40

41 **Supplemental material: S1**

42 **Supplementary Figures:** Figures 1-8

43 **Supplementary Table:** Table S1&2

44 **Identification of various diazotrophic groups that responded to change in land-**

45 **use.** Overall, across all three land use systems, we observed *nifH* sequences from NifH

46 cluster I–V; however, sequences related to clusters I & II were the most dominant (**Fig.**

47 **S6**). The differences among various land use systems were obvious. NifH–I cluster,

48 dominated by the *Alphaproteobacteria*–related *nifH* gene sequences, showed that the

49 *Proteobacteria*–related diazotrophs are susceptible to changes in land use.

50 *Alphaproteobacteria*–related diazotrophs were abundant in the primary and secondary

51 forests (35–41%), whereas *Gammaproteobacteria* (88%) and *Deltaproteobacteria* (55%)

52 were dominated in the pasture soils. Similar to our results, Dörr *et al.* [1] observed the

53 dominance of methanotrophic *Alphaproteobacteria* in the primary forest soils and

54 *Gammaproteobacteria* species in the farmland created after deforestation of the

55 Amazon. Differences among other, less abundant subgroups across different land use

56 systems were also evident (**Fig. S6**), such as in the NifH–II cluster,

57 *Verrucomicrobium*–related *nifH* gene sequences were retrieved in a relatively high

58 abundance (72%) in the pasture lands as compared to primary and secondary forest

59 sites. Similarly, Ranjan *et al.* [2] observed an increase in abundance of overall

60 *Verrucomicrobium*, based on 16S rRNA gene sequences, in response to the conversion

61 of forest to pasture land. The presence of *nifH* gene and N-fixation by *Verrucomicrobium*

62 spp. have been reported previously [3]. Several of the *nifH* genes OPU (operational

63 protein unit) in the NifH–II cluster lacked any cultured representative that suggest the

64 presence of diazotrophs containing novel lineage of *nifH* genes in these different

65 ecosystems (**Fig. S6; Table S1**).

66 The *nifH* gene has been extensively used as a biomarker gene to assess functional  
67 diversity across different environments [4-9], and phylogenetic clustering based on the  
68 *nifH* gene has been corroborated with the 16S rRNA gene-based clustering [10, 11].  
69 However, the taxonomic inference drawn based on the *nifH* gene could possibly be  
70 influenced by the horizontal transfer of this gene [12]. It is encouraging that some of the  
71 diazotrophs related to *Proteobacteria* (Alpha, Beta, Gamma), *Firmicutes*, and  
72 *Actinobacteria* that were detected in this study, have been previously isolated and  
73 characterized by 16S rRNA gene sequencing from the primary forest sites [13]. Future  
74 ongoing culturing and identification of the diazotrophs across these three different land  
75 use systems could further highlight this issue.

## 76 **MATERIALS AND METHODS:**

77 **Identification of diazotrophs.** Major diazotrophic groups susceptible to the change in  
78 land use were identified by analysis of the representative protein sequences at 88%  
79 similarity. Translated *nifH* protein sequences (394,920 sequences, 131,640 per land use  
80 system, subsampled based on the land use system with the least number of DNA  
81 sequences) were aligned with the *nifH* protein sequences of the reference database  
82 from Wang *et al.* [7], and a maximum likelihood (ML) phylogenetic tree was generated  
83 using FastTree. Operational protein units (OPUs) were collapsed at 88% amino acid  
84 similarity level that was corresponding approximately to the class level differences [14].  
85 Distribution of sequences within each OPU were presented as bar graphs.

86 **Quantitative PCR for the *nifH* gene.** The abundances of the *nifH* gene sequences  
87 across different land use systems were quantified through an absolute quantitative PCR  
88 approach. A 25  $\mu$ l qPCR reaction contained 12.5  $\mu$ l of iTaq™ Fast SYBR Green Super  
89 mix (Bio-Rad Inc., Hercules, CA), 100 nM of the *nifH* primers (same as used for

90 high-throughput sequencing) and 10 ng of the template DNA. The *nifH* gene from  
91 *Herbaspirillum seropedicae* (American Type Culture Collection 35892) was cloned into  
92 TOP 10 *Escherichia coli* competent cells and used for the generation of standard curves.  
93 PCR-grade water without template was used as a negative control that did not show any  
94 amplification. The real-time PCR amplification efficiency of *nifH* gene was 98%, and the  
95  $R^2$  of 0.99.

96 Although, we followed the absolute quantification procedure the main purpose was to  
97 assess the relative abundance of diazotrophs across three different land-use systems. In  
98 general, the extracted DNA samples were relatively pure and the quality of the extracted  
99 DNA was very good (as indicated by 260/280 ratios >1.75). Overall, the DNA extraction  
100 yield across three land-use systems was very similar (Pasture  $25 \pm 7.5$  ng/ $\mu$ l; Forest  
101  $31 \pm 3.9$ ; Secondary forest  $29 \pm 8.5$ ). We did evaluate the presence of potential PCR  
102 inhibitors in 15 randomly selected DNA samples (five per land-use system) by  
103 comparing the *nifH* gene copies quantified from concentrated and 1:10 diluted DNA  
104 samples. We did not observe any differences between concentrated vs diluted samples  
105 suggesting the absence of PCR inhibition (data not shown).

106 **Supplementary Figures:** Figures S1-S8

107 **Supplementary Figures:**

108 **Fig. S1:** Taxonomic (black) and phylogenetic (grey)  $\alpha$ -diversity of the *nifH* genes in  
109 response to land use change in the Amazon. Taxonomic diversity was calculated using:  
110 A) Margalef species richness index and B) Shannon diversity index. Phylogenetic  
111 diversity was calculated as Faith's phylogenetic diversity (Faith, 1992). Overall, 135 000  
112 *nifH* gene sequences (45,000 per land use and 1,500 per sample) were used to  
113 calculate  $\alpha$ -diversity. Error bars represent 95% CI.

114 **Fig. S2 A-C:** Diazotrophic community turnover in space, or  $\beta$ -diversity at different DNA  
115 identity levels: A) 95% DNA identity, B) 90% DNA identity, C) 97% protein similarity  
116 (amino acid based) in response to land use change in the Amazon. Differences in the  
117 slopes across different land use systems were compared by power model. Upper panel  
118 represent the variations in the taxonomic  $\beta$ -diversity and lower panel represent the  
119 phylogenetic  $\beta$ -diversity across different land use systems.  $\beta$ -diversity was also calculated  
120 from subsampled data i.e., total 135,000 *nifH* gene sequences (45,000 per land use and  
121 1,500 per sample).

122 **Fig. S3:** Nonmetric multidimensional scaling representation of the *nifH* gene sequence  
123 composition at 97% DNA identity for three different land use systems in the Amazon:  
124 Subsampled data set containing total 135,000 *nifH* gene sequences (45,000 per land  
125 use and 1,500 per sample) were for this comparison.

126 **Fig. S4:** Nonmetric multidimensional scaling representation of the *nifH* gene sequence  
127 composition at different DNA identity (95%, 90%) and protein (97%, 95%) similarity levels  
128 for three different land use systems in the Amazon: Primary forest samples (black  
129 triangle); Pasture samples (white circles); Secondary forest samples (gray squares).  
130 Complete data set containing total 443,600 *nifH* gene sequences and distribution of  
131 number of sequences retrieved from different treatment were: primary forest samples  
132 (158,261); pasture samples (143,700); secondary forest samples (131,640).

133 **Fig. S5:** Log-scale abundance of *nifH* gene copies ( $\text{g}^{-1}$  dry soil) for the three different land  
134 use systems. Each bar represents about 90 samples (30 biological replicates per site and  
135 3 technical replicates) and the error bar represents 95% CI.

136 **Fig. S6:** Maximum likelihood phylogenetic tree based on translated amino acid  
137 sequences of the *nifH* gene from three different land use systems in the Amazon

138 rainforest. The size of each circle is proportionate to the log number of sequences within  
139 an OPU. Total number of sequences in an OPU are also shown next to the taxon  
140 names. Overall, a total of 394,920 *nifH* gene sequences were used and the comparison  
141 was normalized to 131,640 sequences from each treatment based on the least number  
142 of sequences retrieved from secondary forests (131,640 *nifH* gene sequences were  
143 randomly sampled from primary forest and pasture samples to match equal numbers).  
144 Within an operational protein unit (OPU) translated amino acid *nifH* gene sequences  
145 were collapsed at 88% similarity. Numbers at the nodes reflect bootstrap support values  
146 above 70% with branches within clusters being collapsed. Operational protein units  
147 (OPUs) and the closest matched sequences within each OPU that were obtained  
148 through the *nifH* gene reference database were reported in (**SI Table 1**).

149 **Fig. S7: A).** Operational taxonomic unit (OTU) accumulation curve for three land use  
150 systems in the Amazon. Total 443,600 *nifH* gene sequences retrieved from different  
151 treatments (primary forest samples (158,261); pasture samples (143 700); secondary  
152 forest samples (131,640) were used to generate accumulation curve. The observed  
153 number of OTUs were calculated at 97% DNA similarity.

154 **B).** The accumulation curve for each sampling location. Total nine sites, three per land  
155 use system (Forest FI, II, III; Pasture P72I, II, III, and Secondary forest SCI, 93, 98).

156 **Fig. S8:** A spatially explicit sampling scheme that indicates the different sampling  
157 locations within three land use systems. A square box represents 12 sampling points at  
158 each location. Overall 36 soil samples per land use system.

159 **Supplemental Table:**

160 **Table S1:** Operational protein units (OPUs) and the closest matched sequences within each  
161 OPU that were obtained through the *nifH* gene reference database by Wang et al.,  
162 (2013). **Table S2:** Soil physiochemical characteristics of three land-use systems in the  
163 Amazon.

164

165 REFERENCES

- 166 1. Dörr N, Glaser B, Kolb S. 2010. Methanotrophic communities in Brazilian ferralsols  
167 from naturally forested, afforested, and agricultural sites. *Appl Environ Microbiol*  
168 76:1307-1310.
- 169 2. Ranjan K, Paula FS, Mueller RC, Jesus EC, Cenciani K, Bohannan BJ. 2015.  
170 Forest-to-pasture conversion increases the diversity of the phylum *Verrucomicrobia*  
171 in Amazon rainforest soils. *Front Microbiol* 6:779.
- 172 3. Khadem AF, Pol A, Jetten MS, Op den Camp HJM. 2010. Nitrogen fixation by the  
173 verrucomicrobial methanotroph '*Methylococcus* *fumarolicum*' SolV. *Microbiol.*  
174 156: 1052-1059.
- 175 4. Berthrong S, Yeager CM, Gallegos-Graves L, Steven B, Eichorst SA, Jackson RB,  
176 [Kuske CR](#). 2014. Nitrogen fertilization has a stronger effect on soil N-fixing bacterial  
177 communities than elevated atmospheric CO<sub>2</sub>. *Appl Environ Microbiol* 80(10):3103-  
178 3112.
- 179 5. Collavino MM, Tripp HJ, Frank IE, Vidoz ML, Calderoli PA, Donato M,  
180 Zehr JP, Aguilar OM. 2014. *nifH* pyrosequencing reveals the potential for location-  
181 specific soil chemistry to influence N<sub>2</sub>-fixing community dynamics. *Environ Microbiol*  
182 16(10):3211-3223.
- 183 6. Tu Q, Deng Y, Yan Q, Shen L, Lin L, He Z. 2016. Biogeographic Patterns of Soil  
184 Diazotrophic Communities across Six Forests in the North America. *Mol Ecol*  
185 25:2937-2948.
- 186 7. Wang Q, Quensen JF, Fish JA, Lee TK, Sun Y, Tiedje JM. 2013. Ecological  
187 patterns of *nifH* genes in four terrestrial climatic zones explored with targeted  
188 metagenomics using FrameBot, a new informatics tool. *mBio* 4(5):e00592-13..
- 189 8. Zehr JP, Jenkins BD, Short SM, Steward GF. 2003. Nitrogenase gene diversity and  
190 microbial community structure: a cross-system comparison. *Environ Microbiol*  
191 5:539-554.
- 192 9. Hsu SF, Buckley DH. 2009. Evidence for the functional significance of diazotroph  
193 community structure in soil. *ISME J* 3:124-136.
- 194 10. Pan Y, Birdsey RA, Fang J, Houghton R, Kauppi PE, Kurz WA. 2011. A large and  
195 persistent carbon sink in the world's forests. *Science* 333:988-993.
- 196 11. Young JPW. 2005. The phylogeny and evolution of nitrogenases, p 221-241. *In*  
197 Palacios R, Newton WE (ed), *Genomes and Genomics of Nitrogen-fixing*  
198 *Organisms*. Springer, New York, NY.
- 199 12. Bolhuis H, Severin I, Confurius-Guns V, Wollenzien UI, Stal LJ. 2010. Horizontal  
200 transfer of the nitrogen fixation gene cluster in the cyanobacterium *Microcoleus*  
201 *chthonoplastes*. *ISME J* 4:121-130.
- 202 13. Mirza BS, Rodrigues JLM. 2012. Development of a direct isolation procedure for  
203 free-living diazotrophs under controlled hypoxic conditions. *Appl Environ Microbiol*  
204 78: 5542-5549.
- 205 14. Mirza BS, Potisap C, Nüsslein K, Bohannan BJM, Rodrigues JLM. 2014. Response  
206 of free-living nitrogen-fixing microorganisms to land use change in the Amazon  
207 rainforest. *Appl Environ Microbiol* 80:281–288.

209

Fig. S1

97% DNA identity Alpha diversity

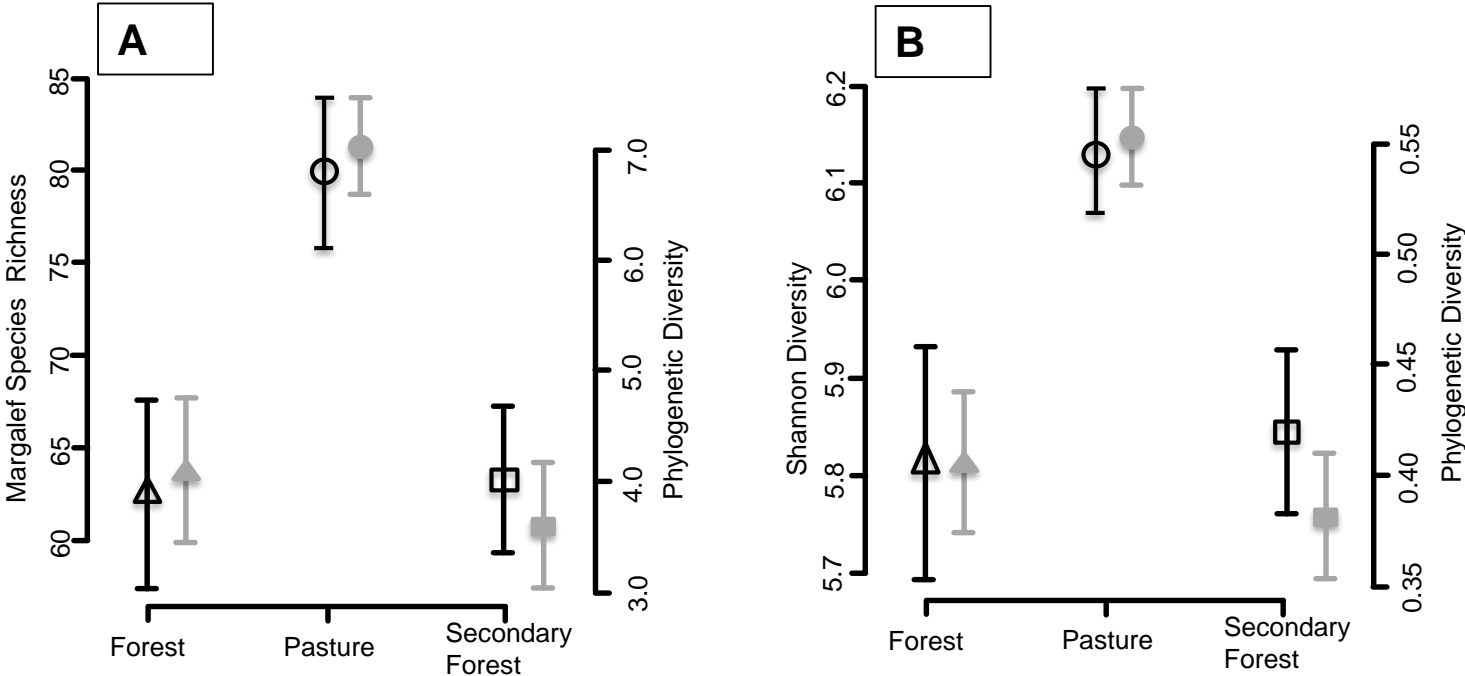



Fig. S2A

# 95% DNA Bray-Curtis and unifrac metrics

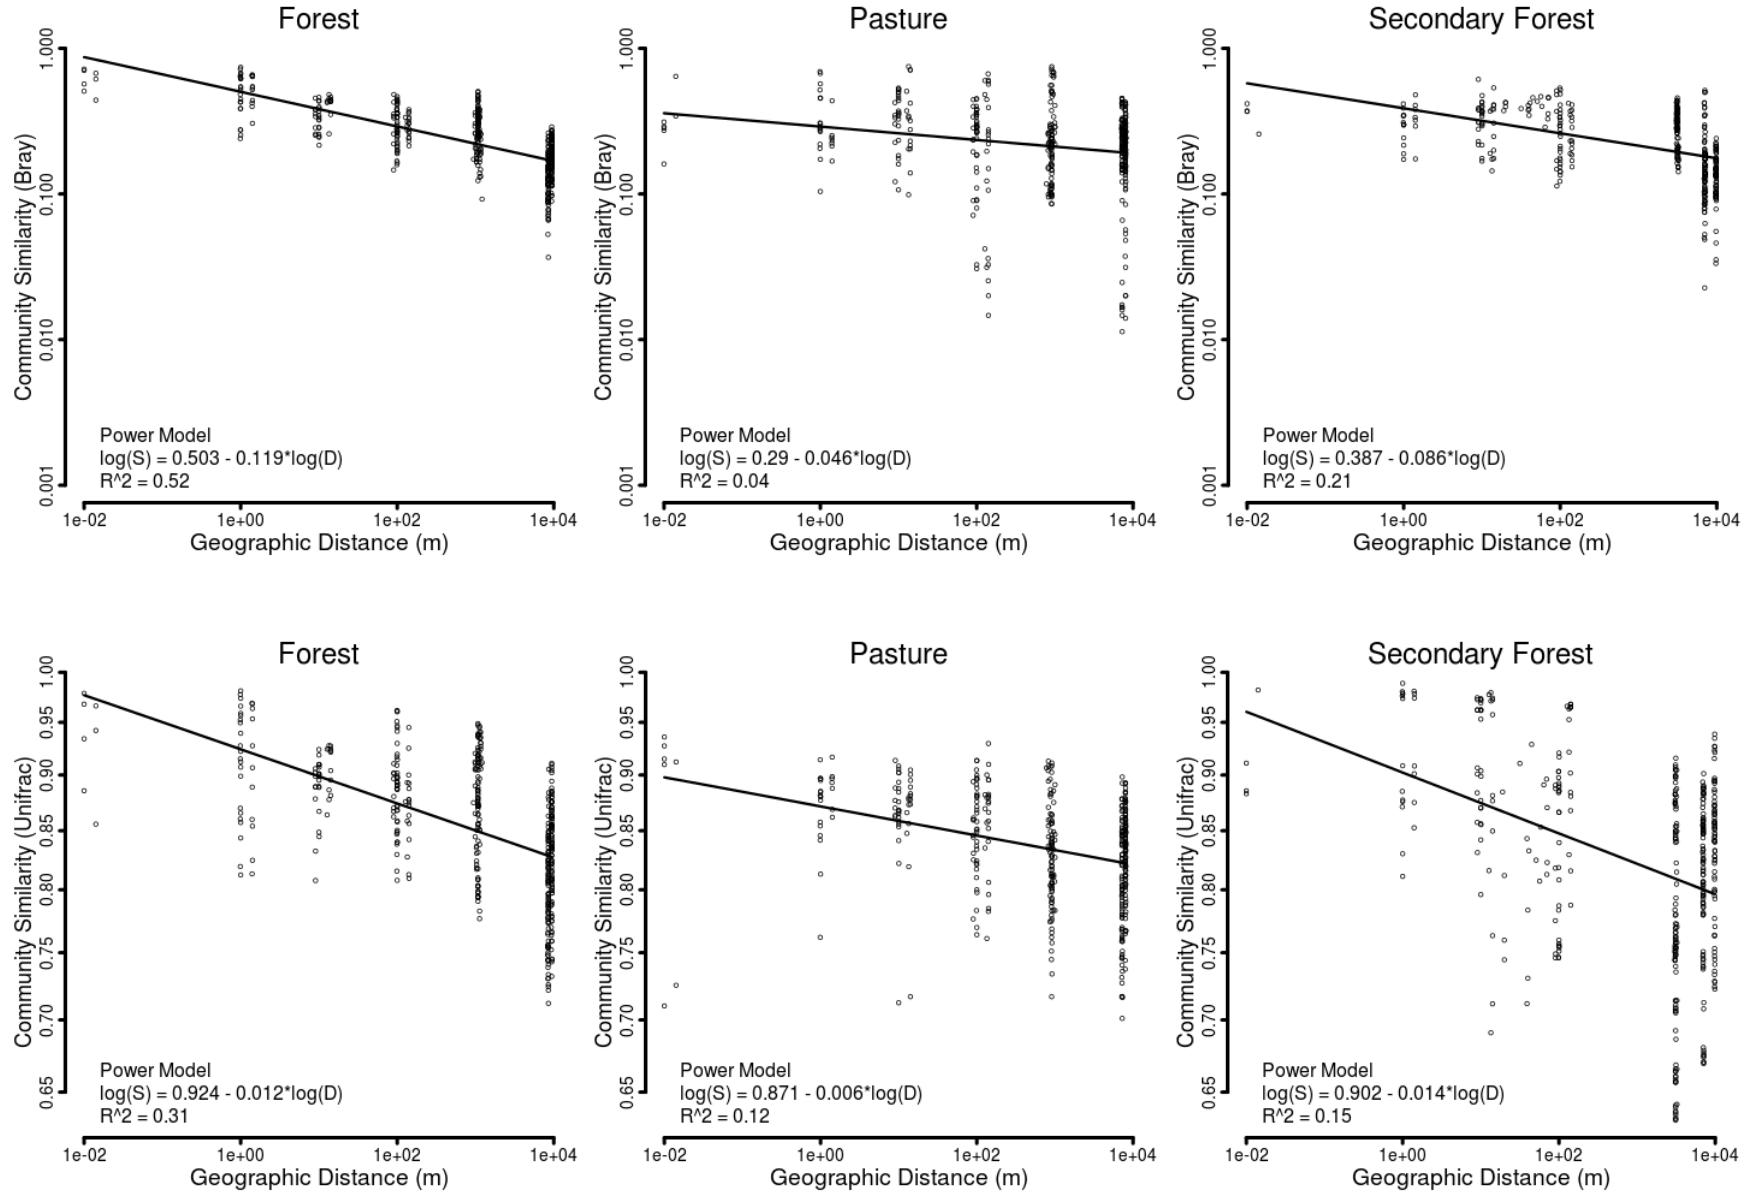

# 90% DNA Bray-Curtis and unifracs metrics

Fig. S2B

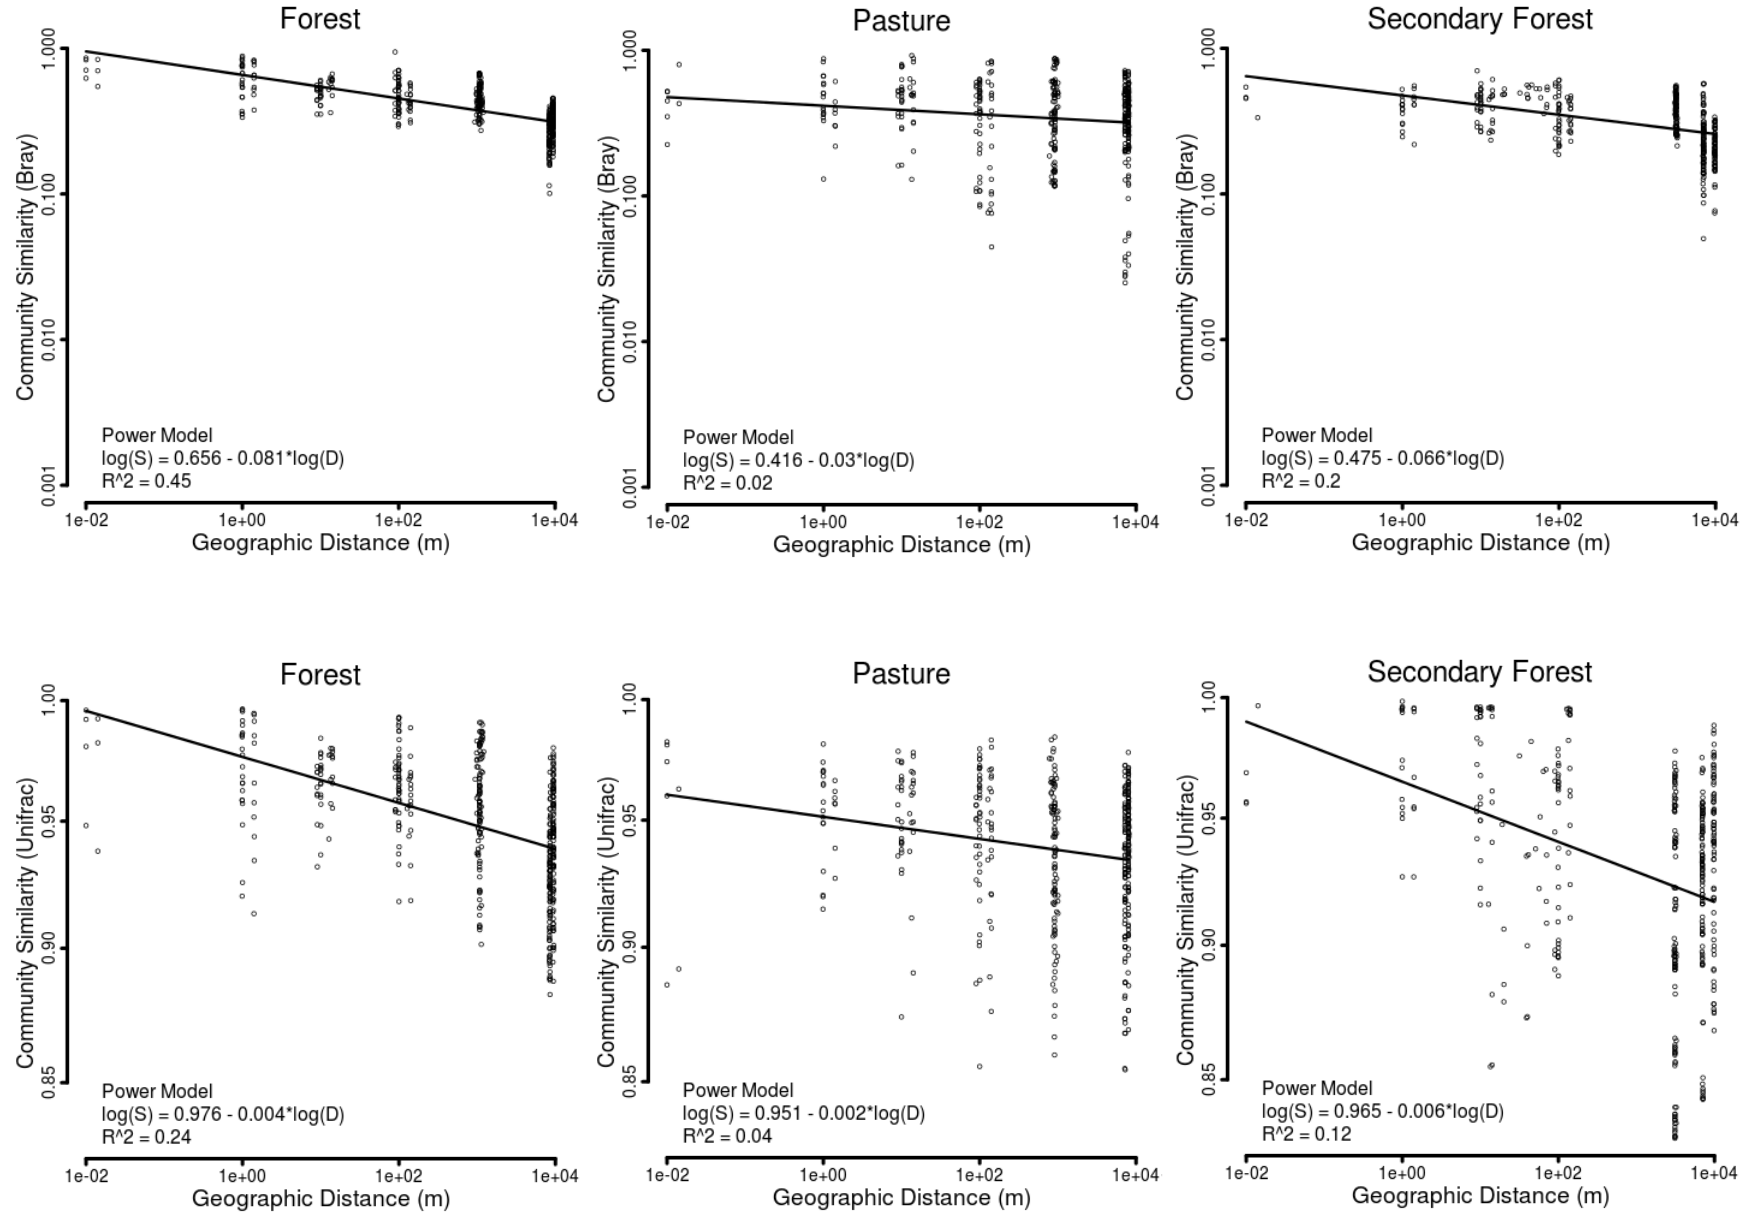

Fig. S2C

97% protein Bray-Curtis and unifracs metrics

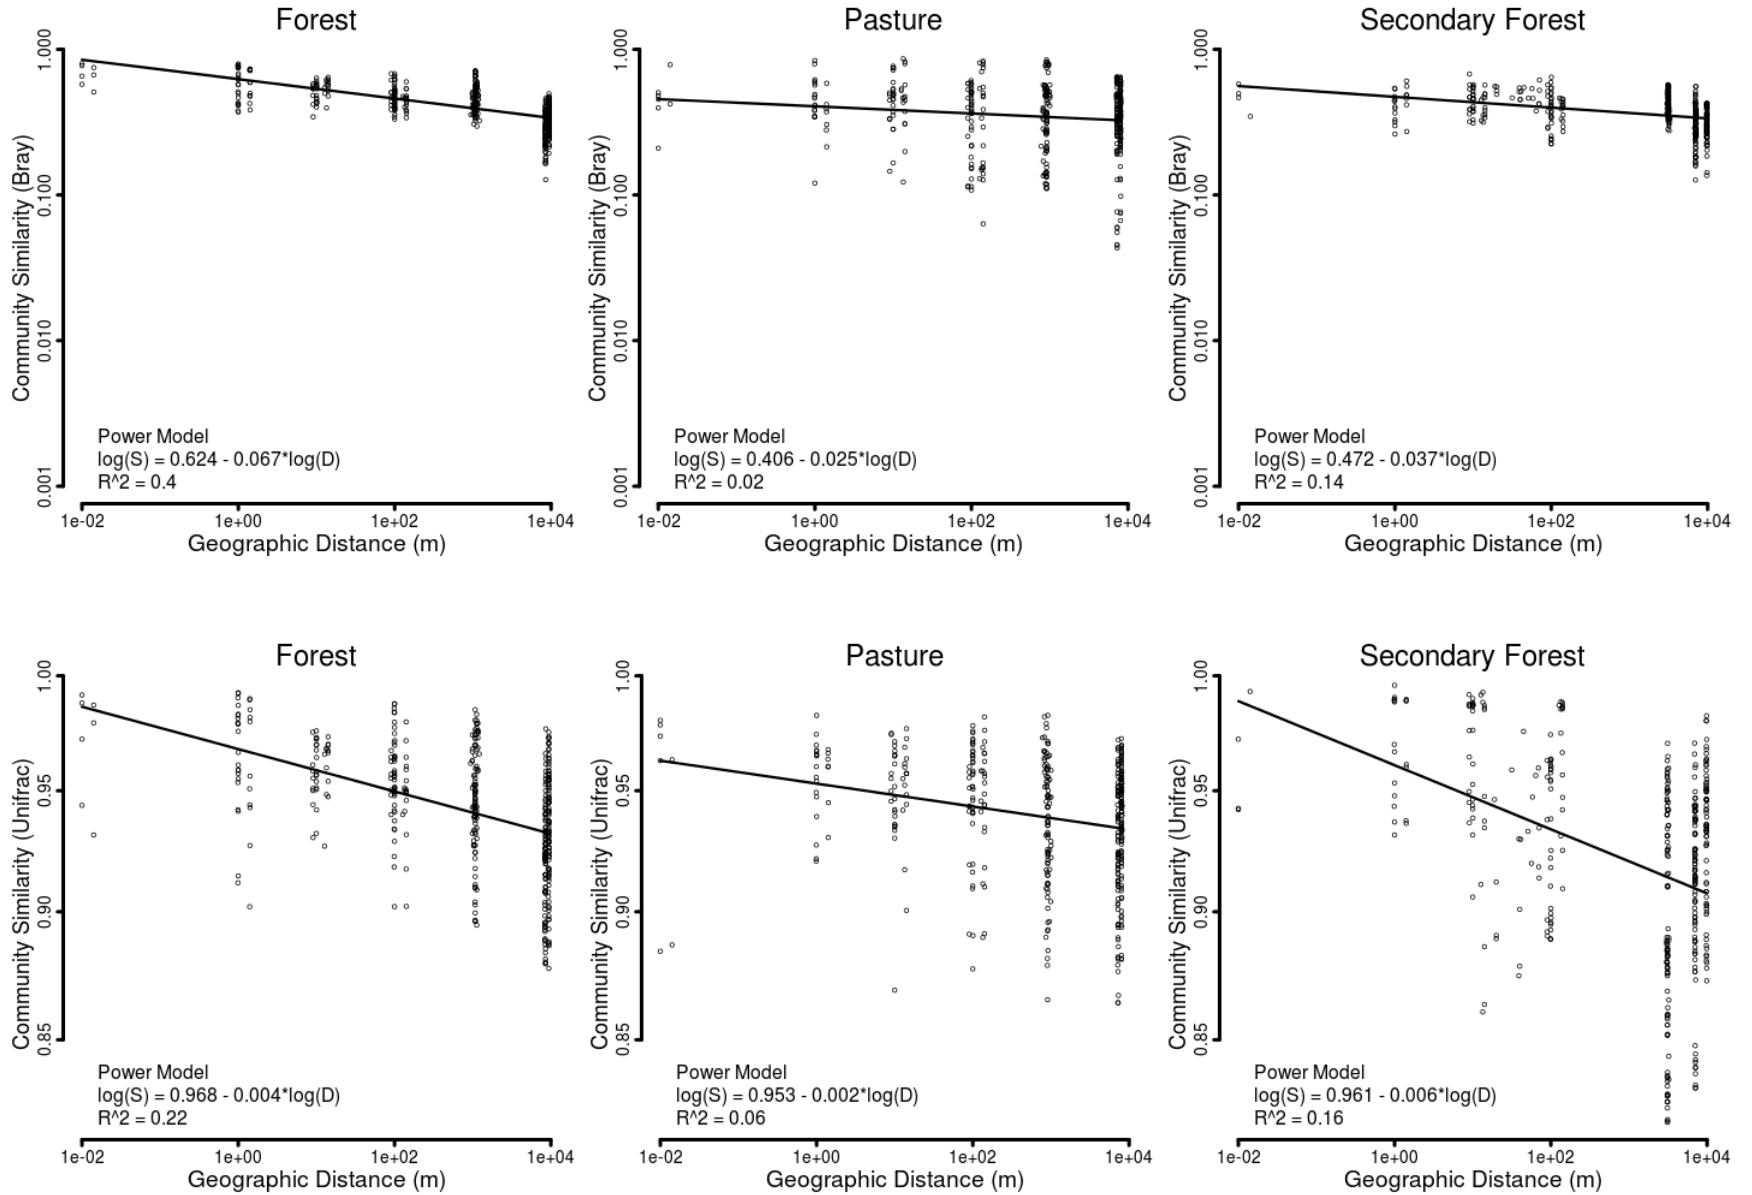

Fig. S3

Analysis of similarity using subsampled data (135,000 *nifH* gene sequences) at 97% DNA similarity

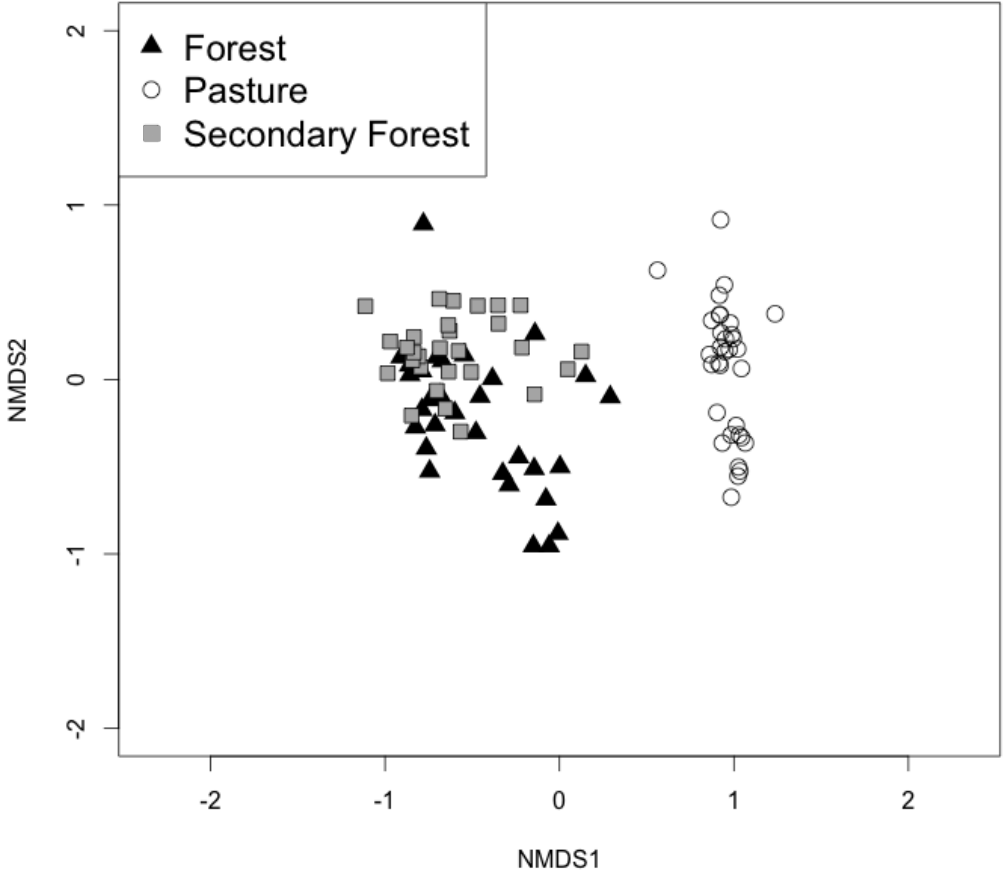

ANOSIM statistic R: 0.7451

Significance: 0.001 Dissimilarity: bray

Fig. S4 Analysis of similarity using complete data (443,000 *nifH* gene sequences) at different DNA and protein similarity levels

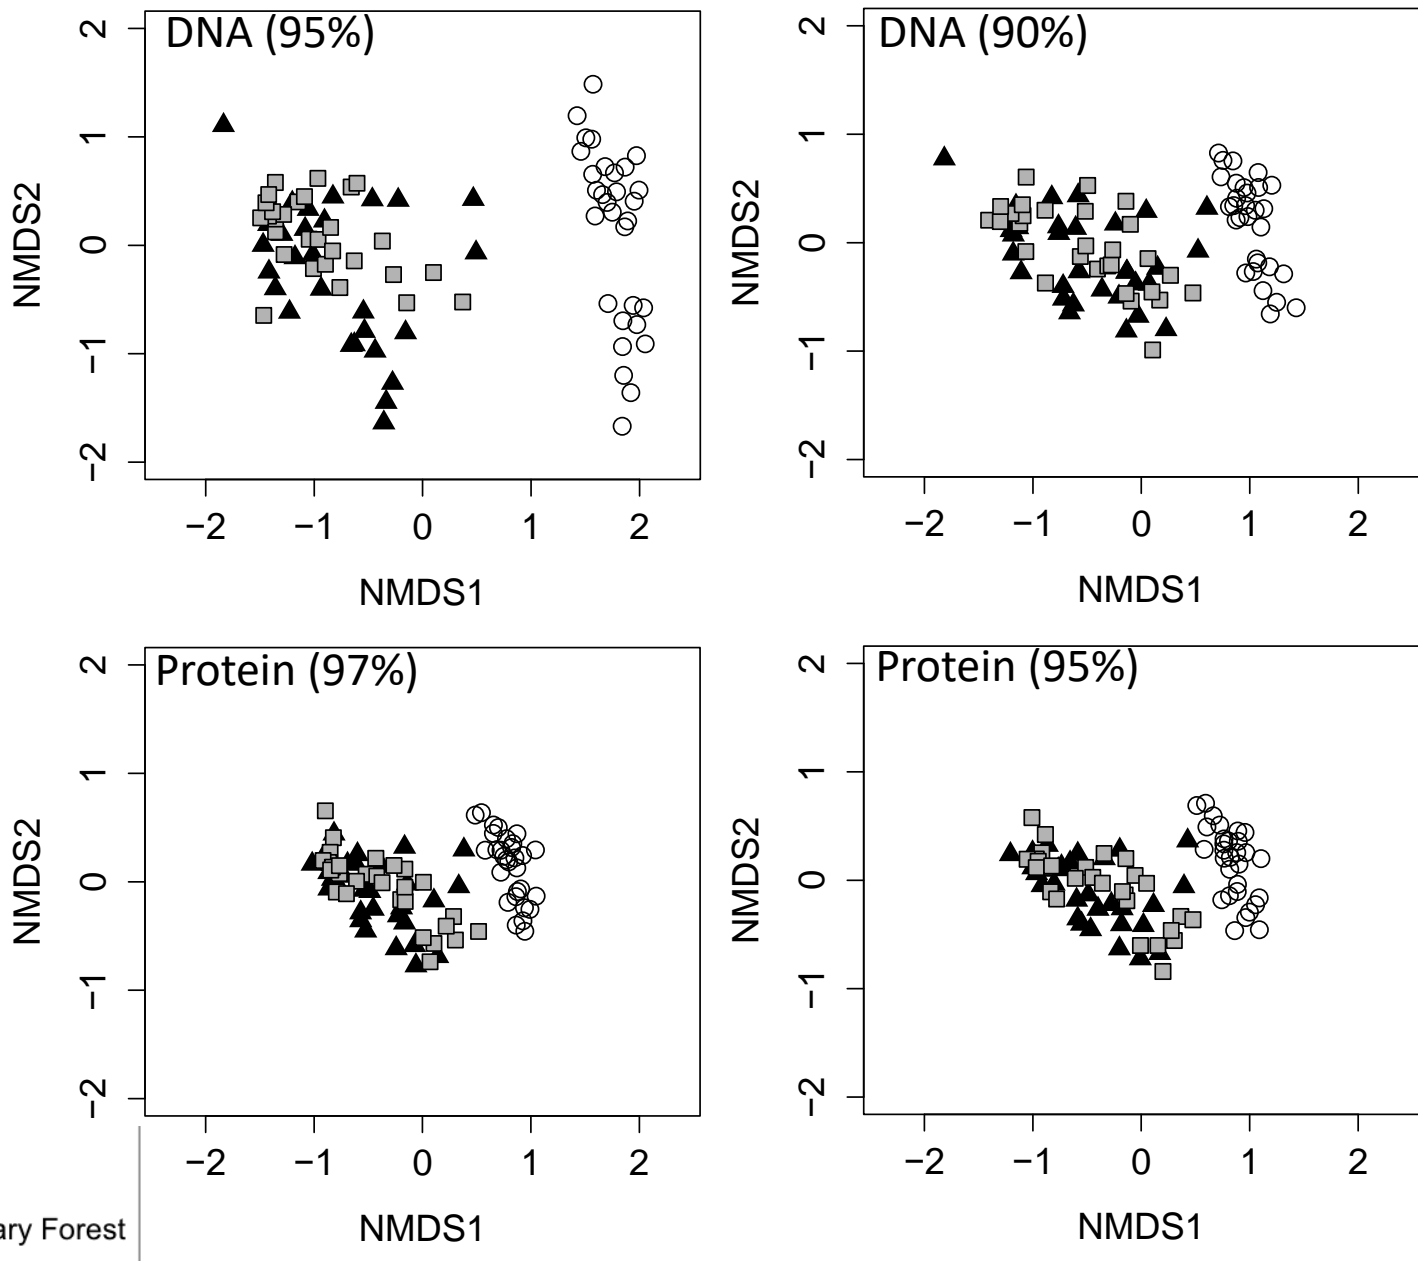

Fig S5: *NifH* gene abundance

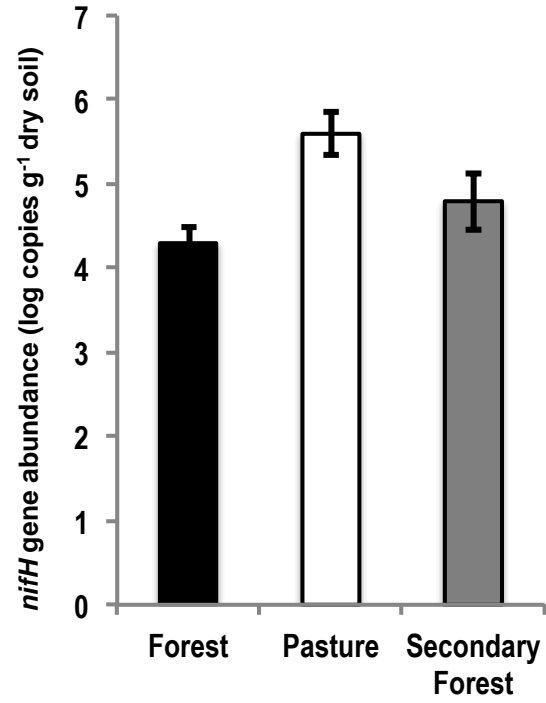

Fig S6: Variation in diazotrophic species

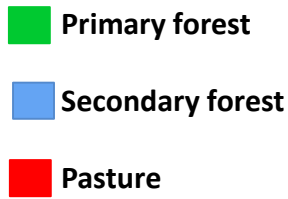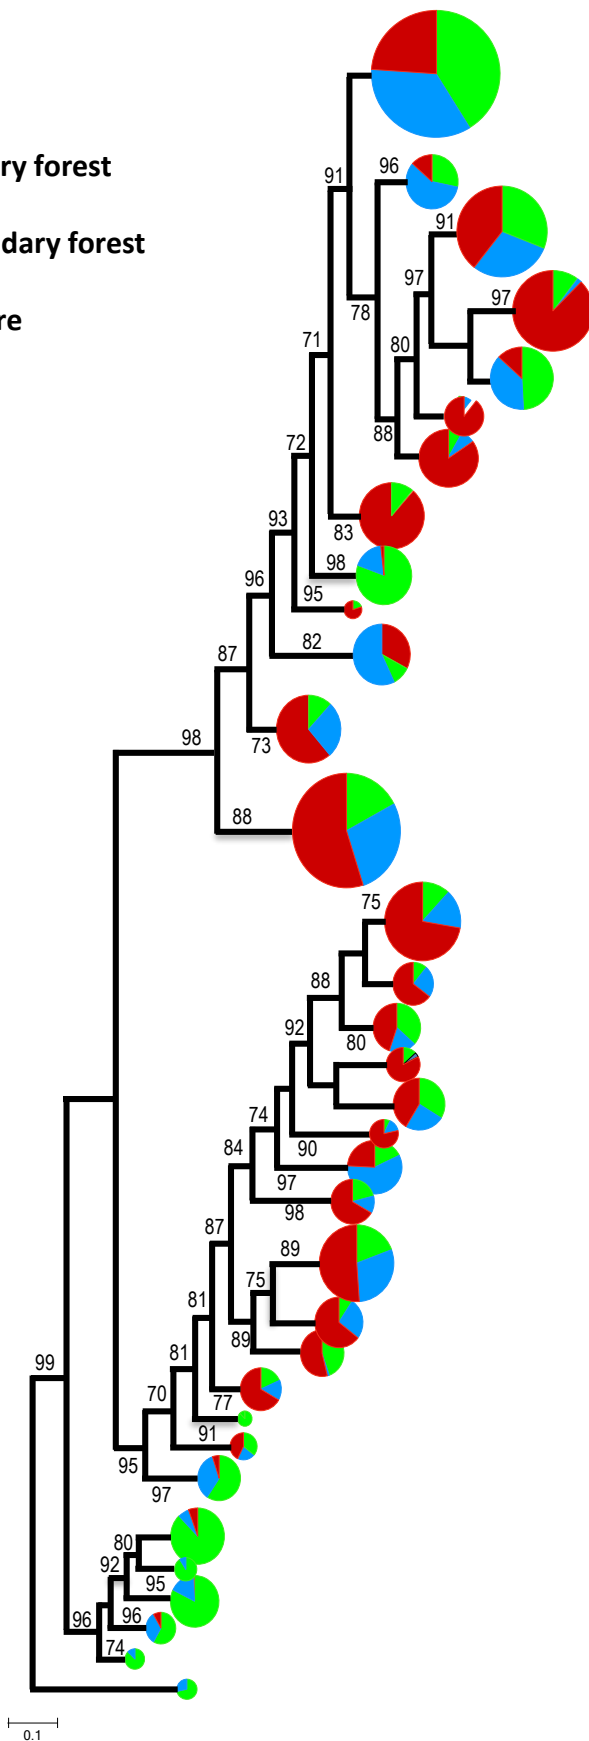

| Number of sequences | Taxonomic description                    | Cluster            |
|---------------------|------------------------------------------|--------------------|
| 267,204             | <i>α-proteobacteria</i>                  | nifH cluster I     |
| 551                 | <i>α-proteobacteria</i>                  |                    |
| 17,800              | <i>β-proteobacteria</i>                  |                    |
| 4,272               | <i>γ-proteobacteria</i>                  |                    |
| 876                 | <i>γ-proteobacteria</i>                  |                    |
| 112                 | <i>Proteobacteria</i> (UC)               |                    |
| 638                 | <i>Proteobacteria</i> (UC)               |                    |
| 1,097               | <i>Proteobacteria</i> (UC)               |                    |
| 906                 | <i>Paenibacillus</i>                     |                    |
| 15                  | <i>Nostoc</i>                            |                    |
| 720                 | <i>Frankia</i>                           | nifH cluster II    |
| 1,379               | <i>Firmicutes</i>                        |                    |
| 88,108              | <i>δ-proteobacteria</i>                  |                    |
| 3,800               | <i>Verrucomicrobium</i>                  |                    |
| 159                 | <i>Desulfobulbus</i> ( $\delta$ )        |                    |
| 288                 | Uncultured                               |                    |
| 68                  | <i>Desulfotomaculum</i>                  |                    |
| 432                 | <i>Spirochetes</i>                       |                    |
| 41                  | Uncultured                               |                    |
| 1,164               | Uncultured                               |                    |
| 168                 | <i>Spirochetes</i>                       | nifH cluster III   |
| 2,958               | Uncultured                               |                    |
| 315                 | <i>δ-proteobacteria</i> (UC)             |                    |
| 185                 | <i>Bacteroidetes</i>                     |                    |
| 159                 | <i>Spirochetes</i> ( <i>treponema</i> )  |                    |
| 15                  | <i>Clostridia</i>                        |                    |
| 41                  | Uncultured                               |                    |
| 232                 | <i>Clostridia</i>                        |                    |
| 647                 | <i>γ-proteobacteria</i>                  |                    |
| 32                  | <i>α-proteobacteria</i>                  |                    |
| 445                 | <i>Clostridia</i>                        |                    |
| 71                  | <i>Clostridia</i>                        |                    |
| 23                  | <i>Methanomicrobia</i>                   |                    |
| 21                  | <i>Firmicutes</i> ( <i>clostridium</i> ) | nifH cluster IIV&V |

Fig. S7

# 97% DNA similarity

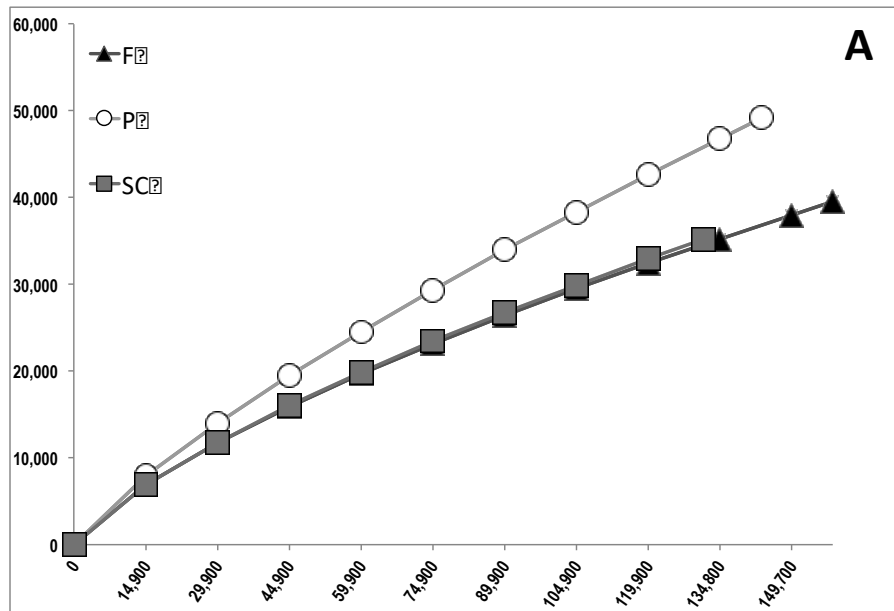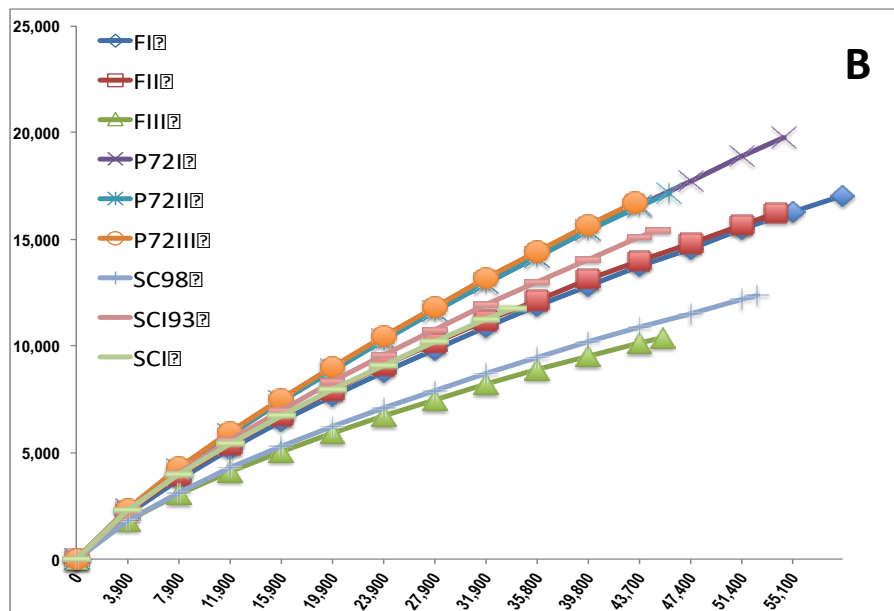



# Fig S8: A Spatially Explicit Sampling Scheme

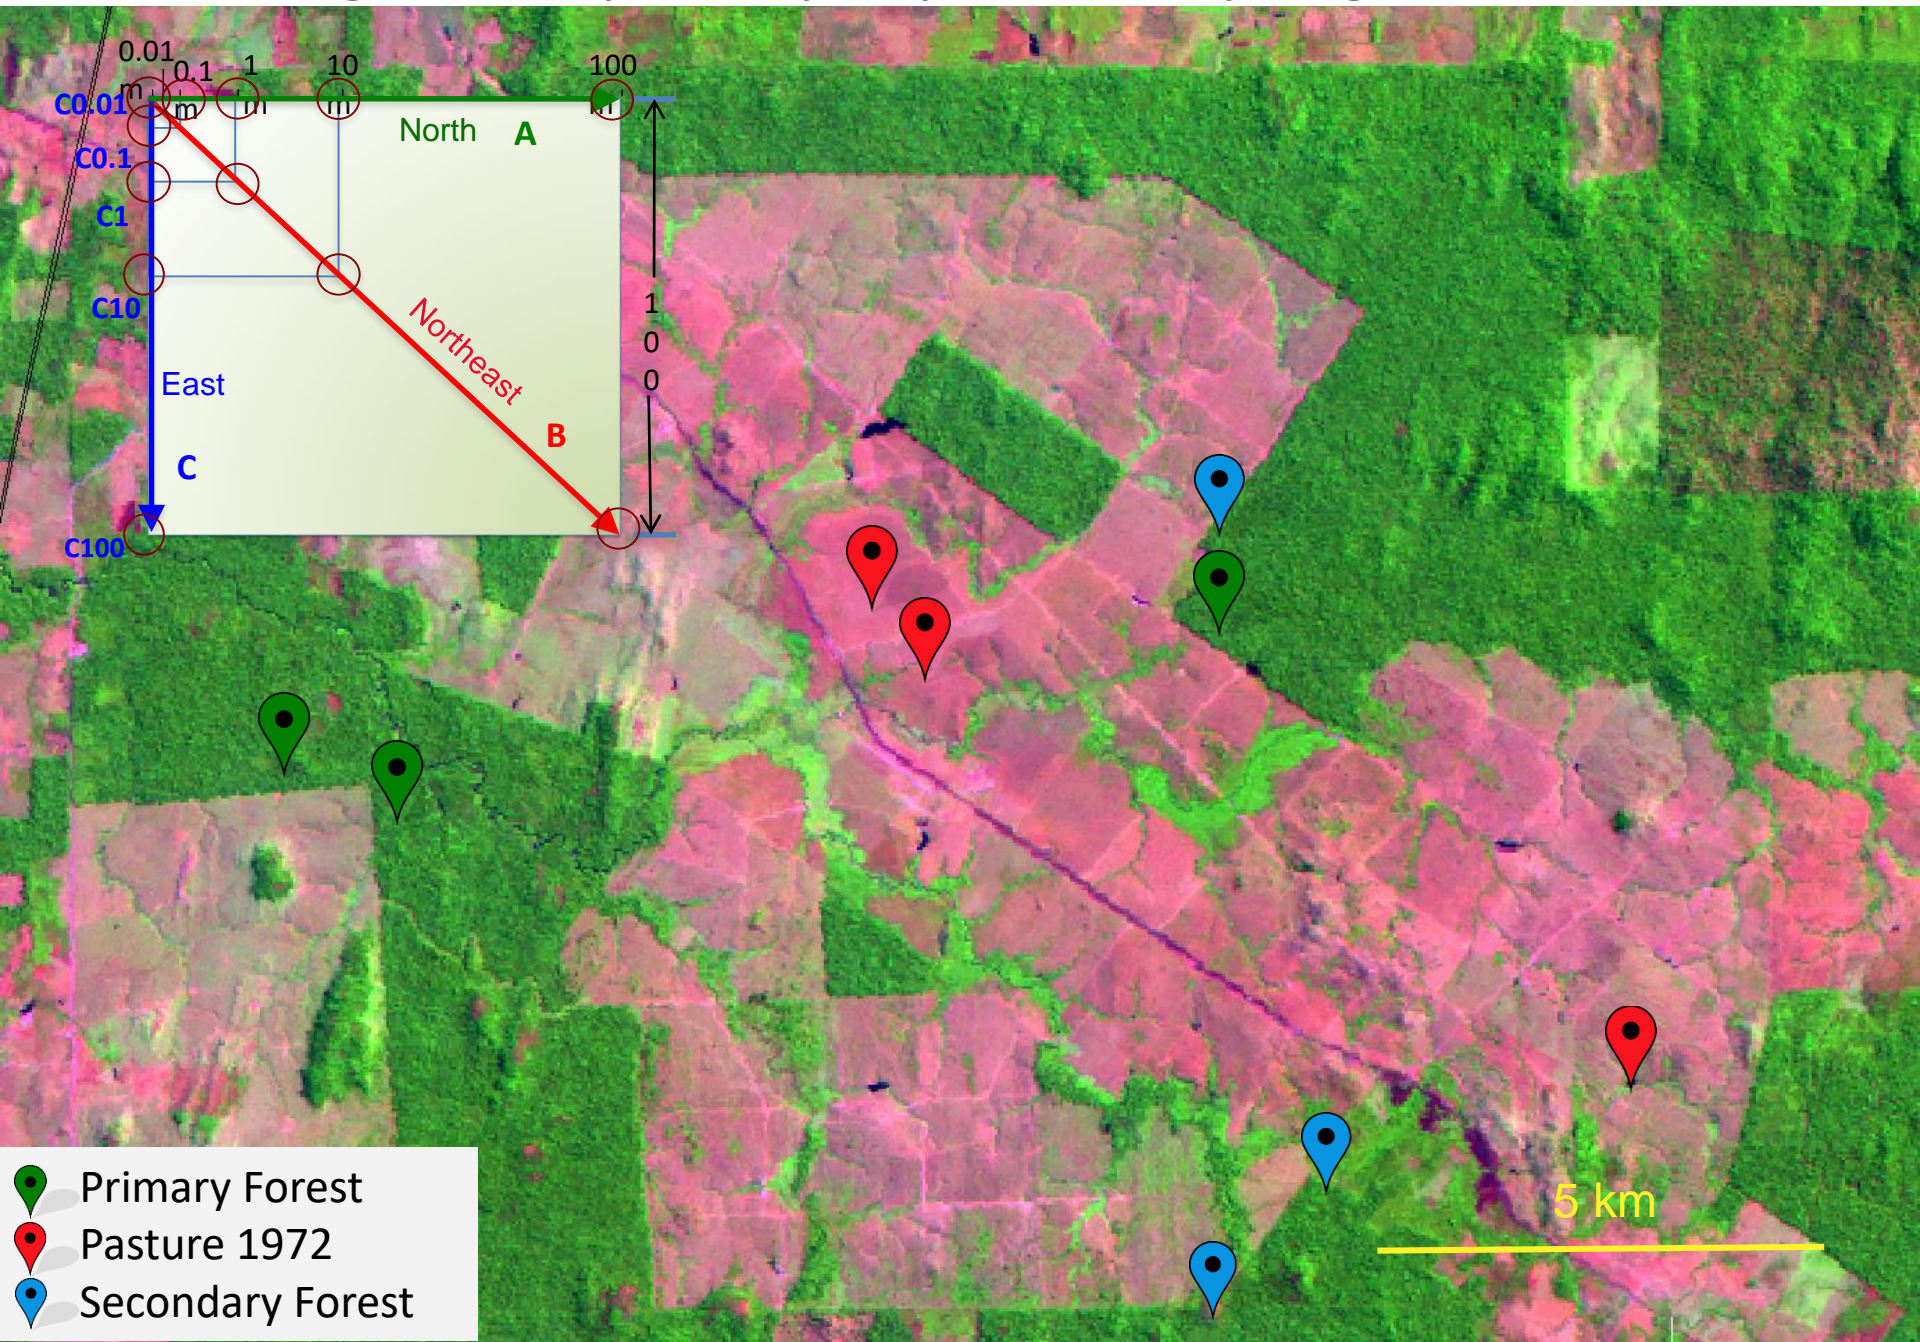

**Table S1.** Operational protein units (OPUs) and the closest matched sequences obtained through Wang et al., (2013) reference data. OPUs were clustered at 88% similarity.

| Cluster                                                   | OPU (No sequences)                                                                                                                                       | Accession No.                                                                                                                                                                                                                                                                                                                                                                                                                                                                                                                                                                                                                                                                                                                                           |
|-----------------------------------------------------------|----------------------------------------------------------------------------------------------------------------------------------------------------------|---------------------------------------------------------------------------------------------------------------------------------------------------------------------------------------------------------------------------------------------------------------------------------------------------------------------------------------------------------------------------------------------------------------------------------------------------------------------------------------------------------------------------------------------------------------------------------------------------------------------------------------------------------------------------------------------------------------------------------------------------------|
| NifH_typer                                                | <i>Alphaproteobacteria</i> (267,204)                                                                                                                     | <i>Zymomonas mobilis</i> (ACQU01000014), <i>Magnetospirillum magneticum</i> (AP007255), <i>Methylocystis</i> sp. (AEVM01000015), <i>Novosphingobium nitrogenifigens</i> (326209574), <i>Rhizobium</i> 1 encoding nitrogenase (152287), <i>Bradyrhizobium</i> sp. ORS278 (146195046), <i>Beijerinckia indica</i> (182633352), <i>Azospirillum amazonense</i> Y2 (346917376), <i>Rhizobium</i> sp ANU289 (169750), <i>Hyphomicrobium</i> sp. MC1 (337761014), Unidentified bacterium nif cluster (13435000), <i>Bradyrhizobium japonicum</i> (EF394157), <i>Bradyrhizobium</i> sp. SEMIA (HQ259566), <i>Azospirillum</i> (DQ787332), <i>Methylocapsa aurea</i> (FN433472), <i>Bradyrhizobium yuanmingense</i> (EF394167), uncultured bacterium (EU912866) |
|                                                           | <i>Alphaproteobacteria</i> (551)                                                                                                                         | <i>Azorhizobium doebereineriae</i> (FJ223129),                                                                                                                                                                                                                                                                                                                                                                                                                                                                                                                                                                                                                                                                                                          |
|                                                           | <i>Betaproteobacteria</i> (17,800)                                                                                                                       | <i>Sideroxydans lithotrophicus</i> ES1 (CP001965), <i>Candidatu Accumulibacter phosphatis</i> (CP001715), <i>Azoarcus</i> sp. BH72 (AF200742), <i>Dechloromonas aromatica</i> RCB (CP000089)                                                                                                                                                                                                                                                                                                                                                                                                                                                                                                                                                            |
|                                                           | <i>Gammaproteobacteria</i> (4,272)                                                                                                                       | <i>Klebsiella pneumoniae</i> 342 (CP000964), <i>Halorhodospira halophila</i> (AB189641)                                                                                                                                                                                                                                                                                                                                                                                                                                                                                                                                                                                                                                                                 |
|                                                           | <i>Gammaproteobacteria</i> (876)                                                                                                                         | <i>Thiorhodococcus drewsii</i> (AFWT01000026)                                                                                                                                                                                                                                                                                                                                                                                                                                                                                                                                                                                                                                                                                                           |
|                                                           | UC-proteobacteria (111)                                                                                                                                  | Uncultured <i>Proteobacteria</i>                                                                                                                                                                                                                                                                                                                                                                                                                                                                                                                                                                                                                                                                                                                        |
|                                                           | UC-proteobacteria (636)                                                                                                                                  | Uncultured <i>Proteobacteria</i>                                                                                                                                                                                                                                                                                                                                                                                                                                                                                                                                                                                                                                                                                                                        |
|                                                           | <i>Alphaproteobacteria</i> (1,099)                                                                                                                       | <i>Rhodomicrobium vannielii</i> (CP002292)                                                                                                                                                                                                                                                                                                                                                                                                                                                                                                                                                                                                                                                                                                              |
|                                                           | <i>Paenibacillus</i> (902)                                                                                                                               | <i>Paenibacillus graminis</i> (AB485747), <i>Paenibacillus polymyxa</i> (HM146187), <i>Paenibacillus azotofixans</i> (AJ299453), <i>Paenibacillus fujiensis</i> (AB489070), <i>Paenibacillus sabiniae</i> (HM583798)                                                                                                                                                                                                                                                                                                                                                                                                                                                                                                                                    |
|                                                           | Cyanobacteria (15)                                                                                                                                       | <i>Nostoc</i> sp. PCC 7120 (17130219), <i>Nostoc azollae</i> (YP_003720733), <i>Anabaena</i> sp. (NC_003272)                                                                                                                                                                                                                                                                                                                                                                                                                                                                                                                                                                                                                                            |
|                                                           | <i>Frankia</i> (718)                                                                                                                                     | <i>Frankia</i> sp. CcI3 (CP000249), <i>Frankia</i> sp. CeF (AC035776), <i>Frankia</i> sp. Cc1. 17 (ACJ24362)                                                                                                                                                                                                                                                                                                                                                                                                                                                                                                                                                                                                                                            |
|                                                           | <i>Firmicutes</i> (1,374)                                                                                                                                | <i>Desulfitobacterium hafniense</i> DCB2 (CP001336), <i>Desulfosporosinus orientis</i> DSM765 (CP003108)                                                                                                                                                                                                                                                                                                                                                                                                                                                                                                                                                                                                                                                |
|                                                           | <i>Deltaproteobacteria</i> (88,108)                                                                                                                      | <i>Geobacter metallireducens</i> GS15 (CP000148), <i>Geobacter bemidjensis</i> (CP001124), <i>Geobacter</i> sp. M18 (ACPJ01000029), <i>Pelobacter propionicus</i> (CP000482), <i>Anaeromyxobacter</i> sp Fw109-5 (CP000769), <i>Anaeromyxobacter</i> sp. K (CP001131), <i>Desulfuromonas acetoxidans</i> DSM 684 (AAEW02000007), <i>Geobacter lovleyi</i> _SZ (CP001089), <i>Geobacter daltonii</i> (YP_002538026), <i>Anaeromyxobacter</i> sp.(YP_001380211), uncultured bacterium (AY601069), uncultured bacterium (AY601072), <i>Geobacter uraniireducens</i> (NC_009483)                                                                                                                                                                            |
|                                                           | NifH_typerII                                                                                                                                             | <i>Verrucomicrobium</i> (3,800)                                                                                                                                                                                                                                                                                                                                                                                                                                                                                                                                                                                                                                                                                                                         |
| <i>Deltaproteobacteria</i> ( <i>Desulfobulbus</i> ) (158) |                                                                                                                                                          | <i>Desulfobulbus propionicus</i> DSM 2032 (CP002364)                                                                                                                                                                                                                                                                                                                                                                                                                                                                                                                                                                                                                                                                                                    |
| Uncultured (287)                                          |                                                                                                                                                          | None                                                                                                                                                                                                                                                                                                                                                                                                                                                                                                                                                                                                                                                                                                                                                    |
| <i>Firmicutes</i> ( <i>Desulfotomaculum</i> ) (67)        |                                                                                                                                                          | <i>Desulfobacca acetoxidans</i> _DSM_11109 (CP002629)                                                                                                                                                                                                                                                                                                                                                                                                                                                                                                                                                                                                                                                                                                   |
| <i>Spirochetes</i> (431)                                  |                                                                                                                                                          | <i>Spirochaeta thermophila</i> DSM6192 (CP001698), <i>Syntrophobacter fumaroxidans</i> MPOB (CP000478)                                                                                                                                                                                                                                                                                                                                                                                                                                                                                                                                                                                                                                                  |
| Uncultured (41)                                           |                                                                                                                                                          | Uncultured methanogenic archaeon_RC-I (AM114193)                                                                                                                                                                                                                                                                                                                                                                                                                                                                                                                                                                                                                                                                                                        |
| Uncultured (1160)                                         |                                                                                                                                                          | None                                                                                                                                                                                                                                                                                                                                                                                                                                                                                                                                                                                                                                                                                                                                                    |
| <i>Spirochetes</i> (167)                                  |                                                                                                                                                          | <i>Spirochaeta smaragdinae</i> DSM11293 (CP002116)                                                                                                                                                                                                                                                                                                                                                                                                                                                                                                                                                                                                                                                                                                      |
| Uncultured (2,962)                                        |                                                                                                                                                          | None                                                                                                                                                                                                                                                                                                                                                                                                                                                                                                                                                                                                                                                                                                                                                    |
| <i>Deltaproteobacteria</i> (314)                          |                                                                                                                                                          | <i>Deltaproteobacterium</i> NaphS2 (300447381)                                                                                                                                                                                                                                                                                                                                                                                                                                                                                                                                                                                                                                                                                                          |
| <i>Bacteroidetes</i> (185)                                |                                                                                                                                                          | <i>Paludibacter propionis</i> WB4 (CP002345)                                                                                                                                                                                                                                                                                                                                                                                                                                                                                                                                                                                                                                                                                                            |
| <i>Spirochetes</i> (treponema) (158)                      |                                                                                                                                                          | <i>Treponema primitia</i> ZAS-2 (CP001843), <i>Treponema azotonutricium</i> ZAS-9 (CP001841)                                                                                                                                                                                                                                                                                                                                                                                                                                                                                                                                                                                                                                                            |
| <i>Clostridia</i> (15)                                    |                                                                                                                                                          | <i>Clostridium thermocellum</i> (CP000568)                                                                                                                                                                                                                                                                                                                                                                                                                                                                                                                                                                                                                                                                                                              |
| Uncultured 41                                             |                                                                                                                                                          | None                                                                                                                                                                                                                                                                                                                                                                                                                                                                                                                                                                                                                                                                                                                                                    |
| <i>Clostridia</i> (231)                                   | <i>Clostridium lentocellum</i> DSM 5427 (296249647), <i>Clostridium cellobioparum</i> (U59414), <i>Clostridium papyrosolvans</i> DSM 2782 (ACXX01000015) |                                                                                                                                                                                                                                                                                                                                                                                                                                                                                                                                                                                                                                                                                                                                                         |
| NifH_typerIII                                             | <i>Gammaproteobacteria</i> (645)                                                                                                                         | <i>Thiorhodococcus drewsii</i> AZ1 (343918744), <i>Dickeya dadantii</i> Ech703 (CP001654)                                                                                                                                                                                                                                                                                                                                                                                                                                                                                                                                                                                                                                                               |
|                                                           | <i>Alphaproteobacteria</i> (32)                                                                                                                          | <i>Zymomonas mobilis</i> subsp pomaceae (CP002865)                                                                                                                                                                                                                                                                                                                                                                                                                                                                                                                                                                                                                                                                                                      |
|                                                           | <i>Clostridia</i> (445)                                                                                                                                  | <i>Clostridium pasteurianum</i> (40593), <i>Desulfosporosinus</i> sp OT (344326083), <i>Clostridium</i> sp. (357172598), <i>Chloroherpeton thalassium</i> ATCC 35110 (CP001100)                                                                                                                                                                                                                                                                                                                                                                                                                                                                                                                                                                         |
|                                                           | <i>Clostridia</i> (70)                                                                                                                                   | <i>Syntrophothermus lipocalidus</i> DSM 12680 (CP002048)                                                                                                                                                                                                                                                                                                                                                                                                                                                                                                                                                                                                                                                                                                |
|                                                           | Methanomicobia (23)                                                                                                                                      | <i>Methanosarcina acetivorans</i> str C2A (19915043), <i>Ethanolins harbinense</i> YUAN-3 (289520023)                                                                                                                                                                                                                                                                                                                                                                                                                                                                                                                                                                                                                                                   |
| NifH_typerIV & V                                          | <i>Firmicutes</i> ( <i>clostridia</i> ) (21)                                                                                                             | <i>Clostridium cellulolyticum</i> H10 (NC_011898), <i>Geobacter</i> sp FRC-32 (CP001390), <i>Syntrophobotulus glycolicus</i> DSM8271 (CP002547), <i>Clostridiales</i> genomosp BVAB3 (CP001850), <i>Clostridium kluyveri</i> DSM 555 (CP000673), <i>Rhodopseudomonas palustris</i> DX1 (283578518)                                                                                                                                                                                                                                                                                                                                                                                                                                                      |

Table S2: Soil physiochemical characteristics of thee land-use systems in the Amazon.

| sample   | pH  | OM | C     | N     | C/N    | P  | S  | K   | Ca  | Mg | Al   | H+Al | SB   | T    | V  | m  | B    | Cu  | Fe  | Mn    | Zn  |
|----------|-----|----|-------|-------|--------|----|----|-----|-----|----|------|------|------|------|----|----|------|-----|-----|-------|-----|
| FIA001   | 4.8 | 45 | 1.586 | 0.159 | 9.956  | 17 | 10 | 1.6 | 48  | 14 | 1    | 22   | 63.6 | 85.6 | 74 | 2  | 0.22 | 0.9 | 6   | 61.6  | 13  |
| FIA1     | 4.8 | 45 | 1.586 | 0.159 | 9.956  | 17 | 10 | 1.6 | 48  | 14 | 1    | 22   | 63.6 | 85.6 | 74 | 2  | 0.22 | 0.9 | 6   | 61.6  | 13  |
| FIA10    | 5.5 | 28 | 3.171 | 0.293 | 10.84  | 9  | 9  | 1.3 | 56  | 20 | 0.01 | 15   | 77.3 | 92.3 | 84 | 0  | 0.2  | 1   | 50  | 40.5  | 3.1 |
| FIA100   | 4.6 | 33 | 5.567 | 0.401 | 13.882 | 11 | 10 | 2.6 | 47  | 12 | 1    | 34   | 61.6 | 95.6 | 64 | 2  | 0.21 | 1.5 | 45  | 77.7  | 5.3 |
| FIB1     | 5.6 | 34 | 1.851 | 0.156 | 11.839 | 9  | 10 | 1.4 | 36  | 11 | 0.01 | 13   | 48.4 | 61.4 | 79 | 0  | 0.2  | 1   | 98  | 47.9  | 3.7 |
| FIB10    | 4.8 | 28 | 2.25  | 0.18  | 12.53  | 10 | 11 | 1.6 | 49  | 15 | 1    | 31   | 65.6 | 96.6 | 68 | 2  | 0.2  | 0.7 | 46  | 36.9  | 2.2 |
| FIB100   | 4.8 | 30 | 1.603 | 0.152 | 10.543 | 9  | 13 | 1   | 31  | 13 | 2    | 34   | 45   | 79   | 57 | 4  | 0.15 | 1.8 | 115 | 162.8 | 5.7 |
| FIC01    | 5.4 | 25 | 2.364 | 0.193 | 12.271 | 6  | 9  | 1   | 16  | 5  | 2    | 18   | 22   | 40   | 55 | 8  | 0.2  | 1.1 | 104 | 57.3  | 2.9 |
| FIC1     | 5.4 | 25 | 2.364 | 0.193 | 12.271 | 6  | 9  | 1   | 16  | 5  | 2    | 18   | 22   | 40   | 55 | 8  | 0.2  | 1.1 | 104 | 57.3  | 2.9 |
| FIC100   | 4.1 | 9  | 4.042 | 0.353 | 11.457 | 22 | 11 | 3   | 130 | 35 | 2    | 22   | 168  | 190  | 88 | 1  | 0.26 | 1.6 | 39  | 84.5  | 8   |
| FIIA001  | 3.9 | 16 | 1.105 | 0.076 | 14.497 | 5  | 9  | 0.8 | 10  | 3  | 1    | 31   | 13.8 | 44.8 | 31 | 7  | 0.19 | 0.9 | 49  | 42.7  | 0.8 |
| FIIA01   | 3.9 | 16 | 1.105 | 0.076 | 14.497 | 5  | 9  | 0.8 | 10  | 3  | 1    | 31   | 13.8 | 44.8 | 31 | 7  | 0.19 | 0.9 | 49  | 42.7  | 0.8 |
| FIIA1    | 3.9 | 16 | 1.105 | 0.076 | 14.497 | 5  | 9  | 0.8 | 10  | 3  | 1    | 31   | 13.8 | 44.8 | 31 | 7  | 0.19 | 0.9 | 49  | 42.7  | 0.8 |
| FIIA100  | 3.6 | 17 | 1.145 | 0.104 | 11.028 | 5  | 11 | 0.6 | 7   | 2  | 3    | 31   | 9.6  | 40.6 | 24 | 24 | 0.24 | 1.9 | 71  | 94    | 1.1 |
| FIIB1    | 4.5 | 15 | 0.781 | 0.068 | 11.536 | 5  | 9  | 0.4 | 16  | 4  | 6    | 18   | 20.4 | 38.4 | 53 | 23 | 0.2  | 0.8 | 32  | 34    | 0.5 |
| FIIB10   | 4.9 | 29 | 3.62  | 0.195 | 18.588 | 8  | 9  | 6   | 20  | 12 | 1    | 16   | 38   | 54   | 70 | 3  | 0.22 | 0.8 | 39  | 75.2  | 1   |
| FIIB100  | 5.2 | 36 | 1.275 | 0.095 | 13.422 | 9  | 12 | 1.8 | 43  | 10 | 0.01 | 18   | 54.8 | 72.8 | 75 | 0  | 0.32 | 1.3 | 45  | 73.4  | 1.3 |
| FIIC01   | 4.1 | 15 | 0.946 | 0.044 | 21.464 | 5  | 8  | 1.4 | 10  | 3  | 1    | 25   | 14.4 | 39.4 | 37 | 6  | 0.2  | 0.8 | 43  | 43.4  | 0.4 |
| FIIC1    | 4.1 | 15 | 0.946 | 0.044 | 21.464 | 5  | 8  | 1.4 | 10  | 3  | 1    | 25   | 14.4 | 39.4 | 37 | 6  | 0.2  | 0.8 | 43  | 43.4  | 0.4 |
| FIIC10   | 4.6 | 18 | 1.245 | 0.116 | 10.735 | 6  | 8  | 0.9 | 17  | 5  | 2    | 18   | 22.9 | 40.9 | 56 | 8  | 0.21 | 0.9 | 39  | 83.8  | 0.5 |
| FIIC100  | 4.2 | 19 | 1.905 | 0.095 | 20.064 | 6  | 9  | 0.6 | 20  | 3  | 1    | 25   | 23.6 | 48.6 | 49 | 4  | 0.23 | 1.2 | 57  | 29.5  | 0.6 |
| FIIAA001 | 3.9 | 13 | 0.658 | 0.044 | 14.997 | 4  | 8  | 1   | 4   | 2  | 2    | 20   | 7    | 27   | 26 | 22 | 0.18 | 0.6 | 36  | 26    | 0.5 |
| FIIAA01  | 3.9 | 13 | 0.658 | 0.044 | 14.997 | 4  | 8  | 1   | 4   | 2  | 2    | 20   | 7    | 27   | 26 | 22 | 0.18 | 0.6 | 36  | 26    | 0.5 |
| FIIAA1   | 3.9 | 13 | 0.658 | 0.044 | 14.997 | 4  | 8  | 1   | 4   | 2  | 2    | 20   | 7    | 27   | 26 | 22 | 0.18 | 0.6 | 36  | 26    | 0.5 |
| FIIAA100 | 4.4 | 14 | 0.306 | 0.015 | 20.569 | 7  | 9  | 2.8 | 7   | 3  | 1    | 11   | 12.8 | 23.8 | 54 | 7  | 0.18 | 0.3 | 26  | 12.2  | 0.7 |
| FIIBB1   | 3.8 | 12 | 0.7   | 0.043 | 16.475 | 5  | 9  | 0.6 | 5   | 1  | 1    | 20   | 6.6  | 26.6 | 25 | 13 | 0.2  | 0.9 | 45  | 27.8  | 0.5 |
| FIIBB10  | 4.2 | 16 | 0.513 | 0.022 | 23.825 | 4  | 8  | 0.4 | 8   | 1  | 6    | 13   | 9.4  | 22.4 | 42 | 39 | 0.16 | 0.7 | 62  | 23.7  | 1   |
| FIIBB100 | 4.2 | 8  | 0.486 | 0.02  | 24.41  | 4  | 8  | 0.4 | 1   | 1  | 1    | 15   | 2.4  | 17.4 | 14 | 29 | 0.18 | 0.1 | 64  | 2     | 0.4 |
| FIIBC01  | 3.7 | 10 | 0.642 | 0.041 | 15.827 | 4  | 9  | 0.6 | 2   | 1  | 2    | 11   | 3.6  | 14.6 | 25 | 36 | 0.22 | 0.8 | 43  | 24.1  | 0.3 |
| FIIBC1   | 3.7 | 10 | 0.642 | 0.041 | 15.827 | 4  | 9  | 0.6 | 2   | 1  | 2    | 11   | 3.6  | 14.6 | 25 | 36 | 0.22 | 0.8 | 43  | 24.1  | 0.3 |
| FIIBC10  | 3.7 | 19 | 0.565 | 0.024 | 23.852 | 6  | 8  | 1.2 | 17  | 4  | 7    | 22   | 22.2 | 44.2 | 50 | 24 | 0.18 | 0.6 | 7   | 15.2  | 1   |
| SC93A01  | 4.5 | 28 | 1.09  | 0.073 | 14.917 | 4  | 9  | 1.5 | 14  | 8  | 2    | 31   | 23.5 | 54.5 | 43 | 8  | 0.16 | 1.6 | 87  | 50.9  | 1.7 |
| SC93A10  | 4   | 19 | 2.183 | 0.133 | 16.434 | 4  | 8  | 1.4 | 6   | 3  | 4    | 31   | 10.4 | 41.4 | 25 | 28 | 0.2  | 1   | 83  | 11.2  | 0.8 |
| SC93A20  | 3.9 | 35 | 1.86  | 0.14  | 13.285 | 8  | 8  | 1.8 | 10  | 7  | 6    | 47   | 18.8 | 65.8 | 29 | 24 | 0.18 | 0.8 | 133 | 16    | 1.3 |
| SC93B1   | 4.2 | 28 | 2.835 | 0.177 | 15.999 | 6  | 8  | 1   | 19  | 7  | 1    | 31   | 27   | 58   | 47 | 4  | 0.15 | 0.8 | 88  | 41.5  | 2.4 |
| SC93B40  | 3.6 | 51 | 1.758 | 0.134 | 13.102 | 9  | 10 | 1.1 | 6   | 4  | 13   | 80   | 11.1 | 91.1 | 12 | 54 | 0.16 | 0.8 | 191 | 28.2  | 4.8 |
| SC93C01  | 4.1 | 32 | 2.438 | 0.158 | 15.436 | 6  | 9  | 1.3 | 16  | 7  | 3    | 42   | 24.3 | 66.3 | 37 | 11 | 0.12 | 0.8 | 96  | 64    | 2.8 |
| SC93C1   | 4.1 | 32 | 2.438 | 0.158 | 15.436 | 6  | 9  | 1.3 | 16  | 7  | 3    | 42   | 24.3 | 66.3 | 37 | 11 | 0.12 | 0.8 | 96  | 64    | 2.8 |
| SC93C10  | 4.3 | 17 | 1.179 | 0.093 | 12.723 | 4  | 9  | 4.1 | 13  | 7  | 1    | 22   | 24.1 | 46.1 | 52 | 4  | 0.15 | 1.1 | 62  | 25.2  | 3.4 |

|           |     |    |       |       |        |   |    |     |    |    |      |    |      |      |    |    |      |     |     |       |      |
|-----------|-----|----|-------|-------|--------|---|----|-----|----|----|------|----|------|------|----|----|------|-----|-----|-------|------|
| SC93C50   | 4.3 | 25 | 2.471 | 0.139 | 17.78  | 5 | 8  | 1.5 | 14 | 7  | 2    | 31 | 22.5 | 53.5 | 42 | 8  | 0.18 | 0.9 | 109 | 14.8  | 26.3 |
| SC98A001  | 4   | 19 | 0.795 | 0.069 | 11.5   | 6 | 13 | 0.9 | 7  | 3  | 4    | 34 | 10.9 | 44.9 | 24 | 27 | 0.22 | 0.7 | 41  | 259.8 | 0.8  |
| SC98A01   | 4   | 19 | 0.795 | 0.069 | 11.5   | 6 | 13 | 0.9 | 7  | 3  | 4    | 34 | 10.9 | 44.9 | 24 | 27 | 0.22 | 0.7 | 41  | 259.8 | 0.8  |
| SC98A1    | 4   | 19 | 0.795 | 0.069 | 11.5   | 6 | 13 | 0.9 | 7  | 3  | 4    | 34 | 10.9 | 44.9 | 24 | 27 | 0.22 | 0.7 | 41  | 259.8 | 0.8  |
| SC98A10   | 3.7 | 14 | 1.005 | 0.081 | 12.474 | 5 | 14 | 0.8 | 3  | 2  | 7    | 34 | 5.8  | 39.8 | 15 | 55 | 0.24 | 0.8 | 42  | 205   | 0.5  |
| SC98A100  | 4.4 | 21 | 0.797 | 0.056 | 14.353 | 5 | 9  | 0.8 | 13 | 4  | 1    | 28 | 17.8 | 45.8 | 39 | 5  | 0.16 | 0.4 | 44  | 134.4 | 0.5  |
| SC98B1    | 3.9 | 14 | 0.766 | 0.064 | 12.025 | 5 | 17 | 0.7 | 4  | 2  | 4    | 31 | 6.7  | 37.7 | 18 | 37 | 0.2  | 0.6 | 35  | 223.2 | 0.4  |
| SC98B10   | 3.9 | 15 | 0.847 | 0.065 | 13.087 | 5 | 19 | 0.7 | 1  | 1  | 5    | 31 | 2.7  | 33.7 | 8  | 65 | 0.21 | 0.5 | 35  | 207.4 | 0.4  |
| SC98B100  | 4.4 | 15 | 1.261 | 0.083 | 15.137 | 3 | 9  | 0.8 | 9  | 2  | 1    | 31 | 11.8 | 42.8 | 28 | 8  | 0.16 | 0.5 | 41  | 55    | 0.3  |
| SC98C01   | 3.9 | 11 | 0.919 | 0.077 | 11.872 | 4 | 21 | 0.6 | 3  | 1  | 6    | 31 | 4.6  | 35.6 | 13 | 57 | 0.21 | 0.6 | 34  | 182.4 | 10.9 |
| SC98C1    | 3.9 | 11 | 0.919 | 0.077 | 11.872 | 4 | 21 | 0.6 | 3  | 1  | 6    | 31 | 4.6  | 35.6 | 13 | 57 | 0.21 | 0.6 | 34  | 182.4 | 10.9 |
| SC98C10   | 4.3 | 15 | 0.843 | 0.069 | 12.207 | 6 | 25 | 2.3 | 8  | 3  | 3    | 25 | 13.3 | 38.3 | 35 | 18 | 0.23 | 0.9 | 33  | 189.2 | 4.7  |
| SC98C100  | 3.7 | 11 | 0.725 | 0.052 | 14.062 | 5 | 13 | 0.8 | 2  | 1  | 7    | 25 | 3.8  | 28.8 | 13 | 65 | 0.21 | 0.7 | 36  | 151.4 | 0.4  |
| SCIA1     | 4.7 | 33 | 1.21  | 0.11  | 11.03  | 6 | 12 | 1.3 | 15 | 9  | 1    | 31 | 25.3 | 56.3 | 45 | 4  | 0.17 | 1.3 | 69  | 59.8  | 6.3  |
| SCIA10    | 4.4 | 33 | 1.68  | 0.15  | 11.1   | 6 | 12 | 1.6 | 20 | 8  | 1    | 34 | 29.6 | 63.6 | 47 | 3  | 0.19 | 1.6 | 95  | 82.8  | 1    |
| SCIA100   | 3.8 | 17 | 1.38  | 0.12  | 11.79  | 5 | 11 | 0.5 | 3  | 2  | 5    | 31 | 5.5  | 36.5 | 15 | 48 | 0.2  | 1.3 | 62  | 7.8   | 0.3  |
| SCIB1     | 4.6 | 37 | 3.6   | 0.22  | 16.61  | 6 | 11 | 1.8 | 25 | 15 | 1    | 25 | 41.8 | 66.8 | 63 | 2  | 0.18 | 1.4 | 69  | 34.9  | 1    |
| SCIB10    | 4.4 | 26 | 2.16  | 0.16  | 13.39  | 6 | 9  | 1.1 | 12 | 8  | 1    | 25 | 21.1 | 46.1 | 46 | 5  | 0.18 | 1.4 | 59  | 41.3  | 1.5  |
| SCIB100   | 4.1 | 17 | 1.62  | 0.12  | 13.24  | 4 | 12 | 0.8 | 7  | 3  | 3    | 42 | 10.8 | 52.8 | 20 | 22 | 0.2  | 1.2 | 64  | 13.3  | 0.3  |
| SCIC1     | 4.6 | 43 | 3.33  | 0.21  | 15.98  | 6 | 13 | 1.5 | 20 | 13 | 1    | 28 | 34.5 | 62.5 | 55 | 3  | 0.15 | 1.3 | 48  | 34.2  | 4.3  |
| SCIC100   | 4.3 | 19 | 1.13  | 0.1   | 11.8   | 5 | 9  | 1.7 | 8  | 5  | 1    | 28 | 14.7 | 42.7 | 34 | 6  | 0.2  | 1   | 64  | 65    | 0.5  |
| P72IA001  | 4   | 25 | 1.2   | 0.07  | 17.91  | 5 | 8  | 1.3 | 9  | 2  | 2    | 15 | 12.3 | 27.3 | 45 | 14 | 0.17 | 1   | 104 | 26.2  | 1    |
| P72IA01   | 4   | 25 | 1.2   | 0.07  | 17.91  | 5 | 8  | 1.3 | 9  | 2  | 2    | 15 | 12.3 | 27.3 | 45 | 14 | 0.17 | 1   | 104 | 26.2  | 1    |
| P72IA1    | 4   | 25 | 1.2   | 0.07  | 17.91  | 5 | 8  | 1.3 | 9  | 2  | 2    | 15 | 12.3 | 27.3 | 45 | 14 | 0.17 | 1   | 104 | 26.2  | 1    |
| P72IA10   | 4.6 | 28 | 1.68  | 0.11  | 15.67  | 4 | 8  | 1.5 | 9  | 2  | 2    | 20 | 12.5 | 32.5 | 38 | 14 | 0.17 | 1.4 | 71  | 26.8  | 1.6  |
| P72IA100  | 4.6 | 28 | 2.21  | 0.14  | 16.17  | 3 | 8  | 0.5 | 16 | 2  | 2    | 22 | 18.5 | 40.5 | 46 | 10 | 0.14 | 1.8 | 95  | 44    | 1.8  |
| P72IB1    | 4.6 | 29 | 1.63  | 0.11  | 14.98  | 3 | 8  | 1.4 | 11 | 3  | 1    | 22 | 15.4 | 37.4 | 41 | 6  | 0.14 | 1.3 | 105 | 26.4  | 1.5  |
| P72IB10   | 4.6 | 29 | 2.16  | 0.113 | 19.113 | 3 | 8  | 1.7 | 10 | 3  | 1    | 22 | 14.7 | 36.7 | 40 | 6  | 0.19 | 1.5 | 65  | 30.9  | 2    |
| P72IB100  | 4.6 | 23 | 1.25  | 0.072 | 17.45  | 3 | 8  | 1   | 9  | 3  | 1    | 22 | 13   | 35   | 37 | 7  | 0.21 | 1   | 67  | 33    | 1.1  |
| P72IC01   | 4.8 | 30 | 1.645 | 0.107 | 15.398 | 4 | 6  | 1.9 | 10 | 4  | 1    | 22 | 15.9 | 37.9 | 42 | 6  | 0.18 | 1   | 112 | 26    | 1.5  |
| P72IC1    | 4.8 | 30 | 1.645 | 0.107 | 15.398 | 4 | 6  | 1.9 | 10 | 4  | 1    | 22 | 15.9 | 37.9 | 42 | 6  | 0.18 | 1   | 112 | 26    | 1.5  |
| P72IC10   | 4.7 | 29 | 1.63  | 0.096 | 16.91  | 6 | 8  | 1.3 | 13 | 4  | 1    | 25 | 18.3 | 43.3 | 42 | 5  | 0.18 | 1.3 | 87  | 33.3  | 2.2  |
| P72IC100  | 4.5 | 29 | 1.755 | 0.11  | 16.011 | 4 | 8  | 1   | 10 | 3  | 1    | 25 | 14   | 39   | 36 | 7  | 0.15 | 0.8 | 98  | 26.1  | 1.6  |
| P72IIA001 | 4.5 | 25 | 2.071 | 0.135 | 15.382 | 3 | 8  | 0.7 | 7  | 2  | 2    | 28 | 9.7  | 37.7 | 26 | 17 | 0.14 | 0.7 | 47  | 23.9  | 0.9  |
| P72IIA01  | 4.5 | 25 | 2.071 | 0.135 | 15.382 | 3 | 8  | 0.7 | 7  | 2  | 2    | 28 | 9.7  | 37.7 | 26 | 17 | 0.14 | 0.7 | 47  | 23.9  | 0.9  |
| P72IIA1   | 4.5 | 25 | 2.071 | 0.135 | 15.382 | 3 | 8  | 0.7 | 7  | 2  | 2    | 28 | 9.7  | 37.7 | 26 | 17 | 0.14 | 0.7 | 47  | 23.9  | 0.9  |
| P72IIB10  | 4.3 | 26 | 1.885 | 0.141 | 13.395 | 3 | 8  | 0.8 | 6  | 3  | 2    | 25 | 9.8  | 34.8 | 28 | 17 | 0.17 | 0.8 | 65  | 24.3  | 1.2  |
| P72IIB100 | 5   | 33 | 2.038 | 0.128 | 15.928 | 4 | 12 | 7   | 13 | 8  | 0.01 | 18 | 28   | 46   | 61 | 0  | 0.18 | 1   | 96  | 48    | 2.1  |
| P72IIC01  | 4.3 | 30 | 1.98  | 0.133 | 14.927 | 3 | 8  | 1.2 | 8  | 3  | 3    | 28 | 12.2 | 40.2 | 30 | 20 | 0.18 | 0.8 | 57  | 24.9  | 1.3  |
| P72IIC10  | 4.8 | 44 | 3.532 | 0.203 | 17.387 | 6 | 8  | 1.2 | 23 | 5  | 1    | 31 | 29.2 | 60.2 | 49 | 3  | 0.22 | 1.5 | 88  | 51.2  | 4    |
| P72IIC100 | 4.4 | 33 | 2.544 | 0.172 | 14.834 | 4 | 7  | 1.7 | 9  | 4  | 3    | 31 | 14.7 | 45.7 | 32 | 17 | 0.2  | 1.3 | 77  | 55.8  | 1.5  |

|            |     |    |       |       |        |    |    |     |    |    |      |    |      |      |    |   |      |     |     |       |      |
|------------|-----|----|-------|-------|--------|----|----|-----|----|----|------|----|------|------|----|---|------|-----|-----|-------|------|
| P72IIIA01  | 5.1 | 44 | 5.342 | 0.409 | 13.061 | 18 | 9  | 3.2 | 28 | 7  | 0.01 | 31 | 38.2 | 69.2 | 55 | 0 | 0.2  | 5.8 | 198 | 222   | 14   |
| P72IIIA1   | 5.1 | 44 | 5.342 | 0.409 | 13.061 | 18 | 9  | 3.2 | 28 | 7  | 0.01 | 31 | 38.2 | 69.2 | 55 | 0 | 0.2  | 5.8 | 198 | 222   | 14   |
| P72IIIA10  | 5.3 | 54 | 5.245 | 0.424 | 12.365 | 16 | 9  | 4.3 | 39 | 12 | 0.01 | 28 | 55.3 | 83.3 | 66 | 0 | 0.22 | 5.8 | 142 | 203   | 16.4 |
| P72IIIA100 | 5.1 | 49 | 5.186 | 0.452 | 11.474 | 10 | 9  | 3.5 | 27 | 7  | 0.01 | 31 | 37.5 | 68.5 | 55 | 0 | 0.22 | 5.6 | 70  | 193.4 | 9.4  |
| P72IIIB1   | 5.2 | 41 | 2.495 | 0.219 | 11.4   | 8  | 9  | 1.7 | 25 | 4  | 0.01 | 28 | 30.7 | 58.7 | 52 | 0 | 0.2  | 5.1 | 103 | 184.6 | 9.6  |
| P72IIIB100 | 5.3 | 50 | 7.476 | 0.581 | 12.873 | 29 | 15 | 4.6 | 33 | 14 | 0.01 | 28 | 51.6 | 79.6 | 65 | 0 | 0.22 | 5.4 | 128 | 171.6 | 12.3 |
| P72IIIC01  | 5.2 | 62 | 6.446 | 0.47  | 13.724 | 15 | 9  | 2.4 | 30 | 9  | 0.01 | 34 | 41.4 | 75.4 | 55 | 0 | 0.2  | 5.7 | 131 | 163.4 | 15.5 |
| P72IIIC1   | 5.2 | 62 | 6.446 | 0.47  | 13.724 | 15 | 9  | 2.4 | 30 | 9  | 0.01 | 34 | 41.4 | 75.4 | 55 | 0 | 0.2  | 5.7 | 131 | 163.4 | 15.5 |
| P72IIIC10  | 5.5 | 43 | 3.604 | 0.268 | 13.43  | 19 | 9  | 1.4 | 35 | 9  | 0.01 | 20 | 45.4 | 65.4 | 69 | 0 | 0.18 | 4.2 | 59  | 165.8 | 12.2 |
| P72IIIC100 | 5.3 | 50 | 3.043 | 0.276 | 11.045 | 11 | 13 | 1.7 | 23 | 8  | 0.01 | 31 | 32.7 | 63.7 | 51 | 0 | 0.21 | 5   | 255 | 174.8 | 7.9  |

**Measured soil variables:** OM, organic matter; C, carbon; N, nitrogen; pH, potential activity of hydrogen; P, phosphorus; S, sulfur; K, potassium; Ca, calcium; Mg, magnesium; Al, aluminum; H<sup>+</sup>, hydrogen; CEC, potential cation exchange capacity; V, base saturation; Al<sup>+</sup> sat, aluminum saturation. C and N are expressed in g.Kg<sup>-1</sup> soil; P and S are expressed as mg dm<sup>-3</sup>; K, Ca, Mg, Al and CEC are expressed in mmol c.dm<sup>-3</sup>.

List of the 19 soil samples produced <1500 nifH gene sequences were not included in this study. Overall 89 soil samples were analyzed across three different land-use systems.

FIA01, FIC10, FIA10, FIIIA10, FIIC100  
P72IB1, P72IIA10, P72IIA100, P72IIB1, P72C1, P72IIIA001, P72IIIB10  
SC98B1, SCI93A001, SCI93B10, SCIC10,  
SCI93A40, SCIA001, SCIA01
